# Supplementary material for: Compositional defects in a MoAlB MAB phase thin film grown by high-power pulsed magnetron sputtering
Source: Royal Society of Chemistry journal article supplement (doi:10.1039/d3nr04233b), 2023-01-01
Supplement: d3nr04233b1.pdf [file d3nr04233b1.pdf]

## **Compositional defects in MoAlB MAB phase thin film grown by high-power pulsed magnetron sputtering**

Rajib Sahu<sup>a,b,1,\*</sup>, Dimitri Bogdanovski<sup>b,1,\*</sup>, Jan-Ole Achenbach<sup>b</sup>, Marcus Hans<sup>b</sup>, Daniel Primetzhofer<sup>c</sup>, Jochen M. Schneider<sup>a,b</sup>, Christina Scheu<sup>a,d,\*</sup>

<sup>a</sup>Max-Planck-Institut für Eisenforschung GmbH, Max-Planck-Str. 1, 40237 Düsseldorf, Germany

<sup>b</sup>Materials Chemistry, RWTH Aachen University, Kopernikusstr. 10, 52074 Aachen, Germany

<sup>c</sup>Department of Physics and Astronomy, Uppsala University, Box 516, S-75120 Uppsala, Sweden

<sup>d</sup>Materials Analytics, RWTH Aachen University, Kopernikusstr. 10, 52074 Aachen, Germany

<sup>1</sup>Equally contributing authors: Rajib Sahu and Dimitri Bogdanovski

\*Corresponding authors: r.sahu@mpie.de, bogdanovski@mch.rwth-aachen.de, c.scheu@mpie.de,

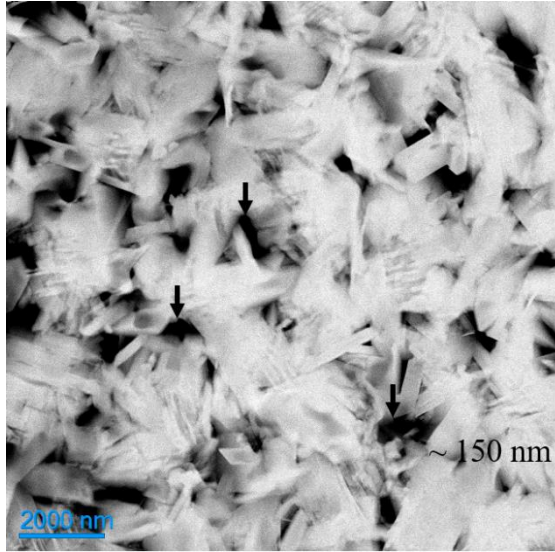

Figure. S1: Plan view STEM image of DC magnetron sputtering MoAlB thin film.

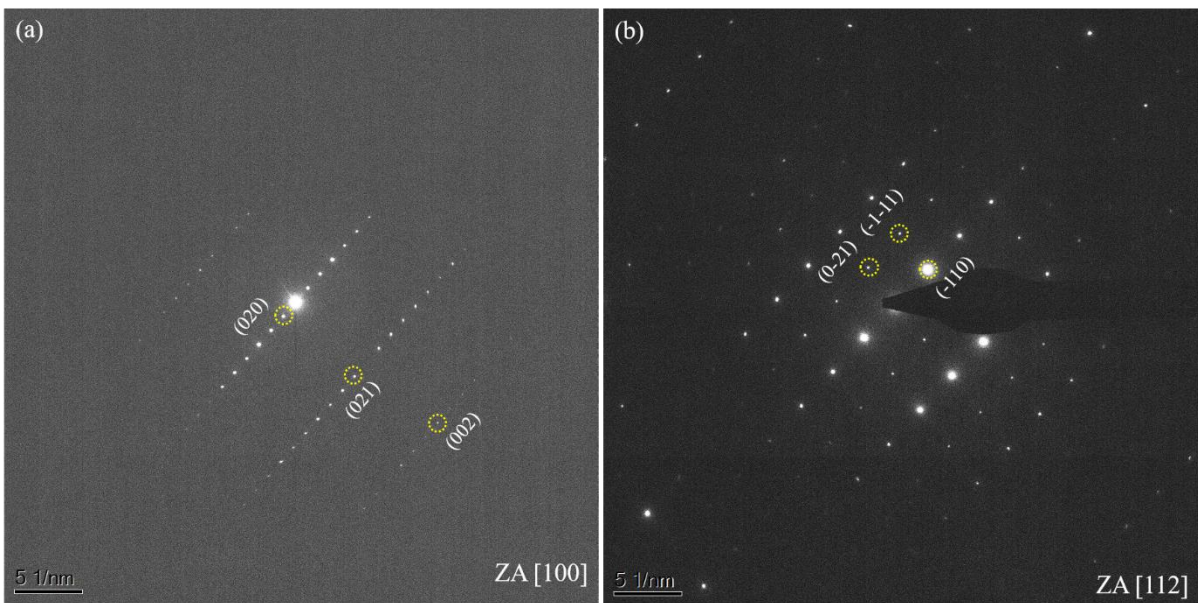

Figure. S2: (a)-(b) Selected area diffraction of as-deposited MoAlB thin film.

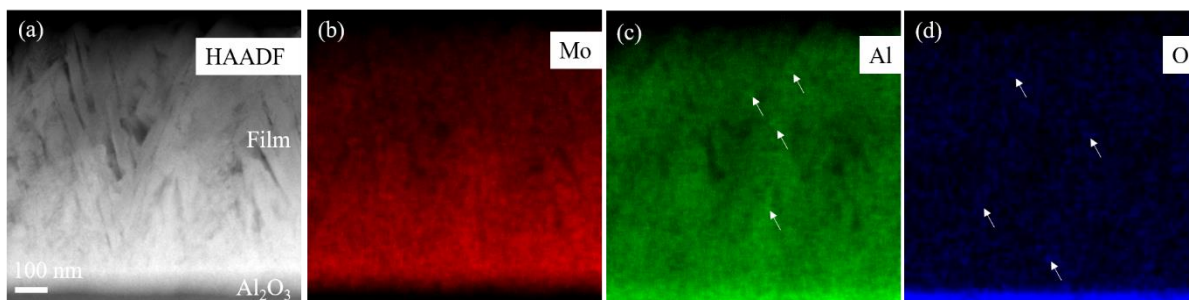

Figure. S3: Elemental composition of MoAlB (a) is shown in (b)-(d). Al-rich (c) and O-rich (d) impurity phases are marked by white arrows.

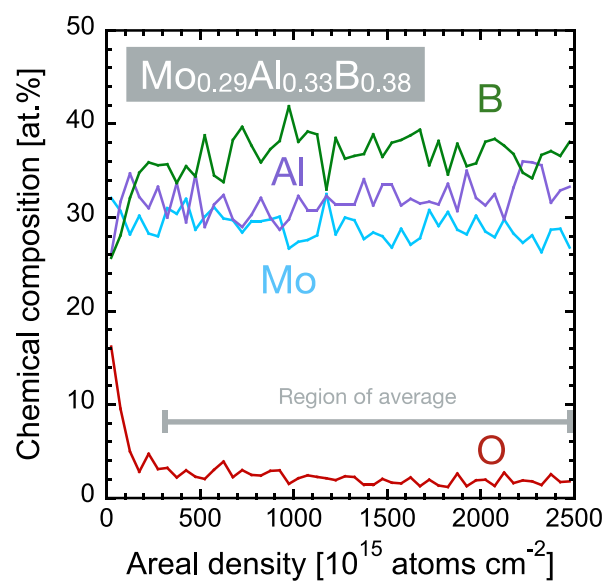

Figure. S4: ToF-ERDA depth profiling of as synthesized MoAlB thin film.

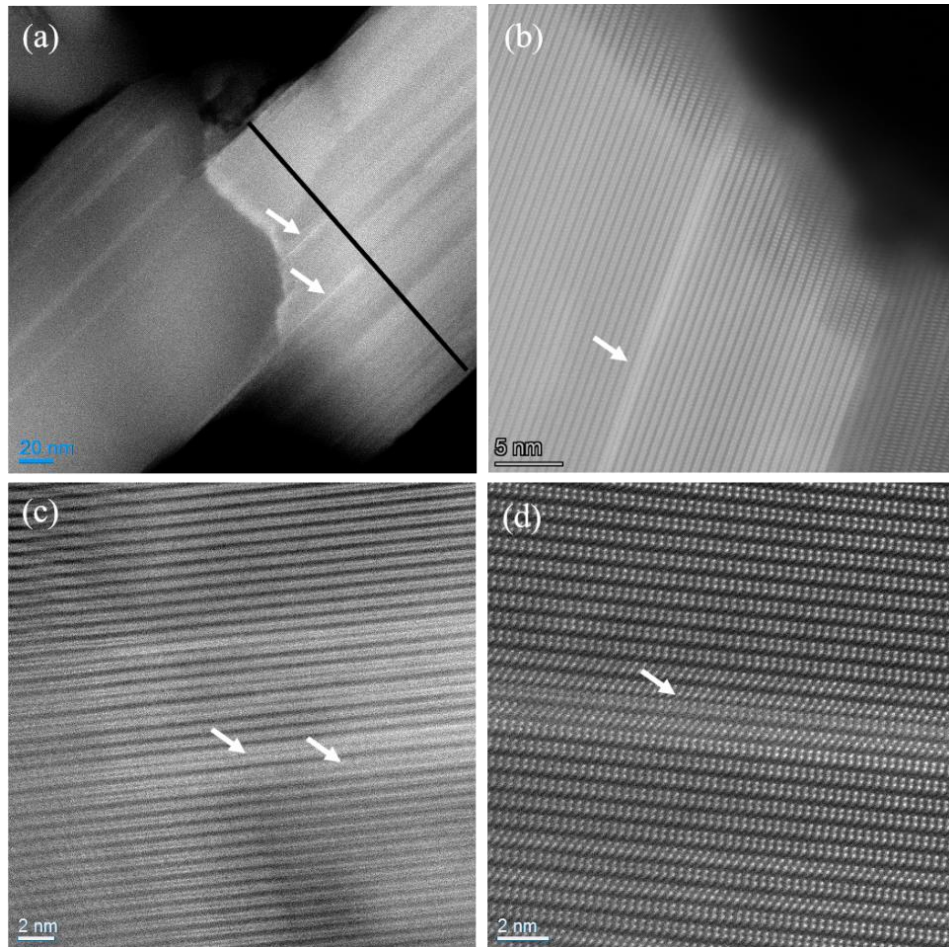

Figure. S5: (a)-(d) STEM images of compositional defect phase  $\text{Mo}_4\text{Al}_3\text{B}_4$  (marked by white arrows) from different grains. (a) is used to calculate defect fraction of  $\text{Mo}_4\text{Al}_3\text{B}_4$  inside  $\text{MoAlB}$  matrix.

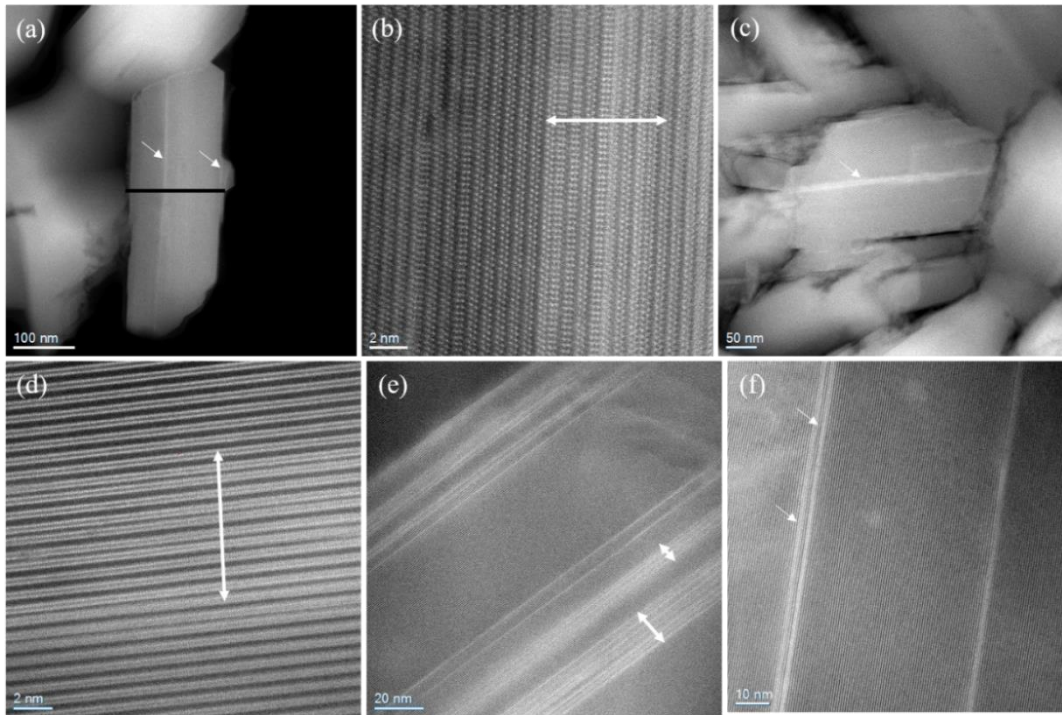

Figure. S6: (a)-(f) HAADF STEM images of compositional defect phase  $\text{Mo}_6\text{Al}_5\text{B}_6$  (marked white arrows). (a) is used to calculate defect fraction of  $\text{Mo}_6\text{Al}_5\text{B}_6$  inside  $\text{MoAlB}$  matrix.

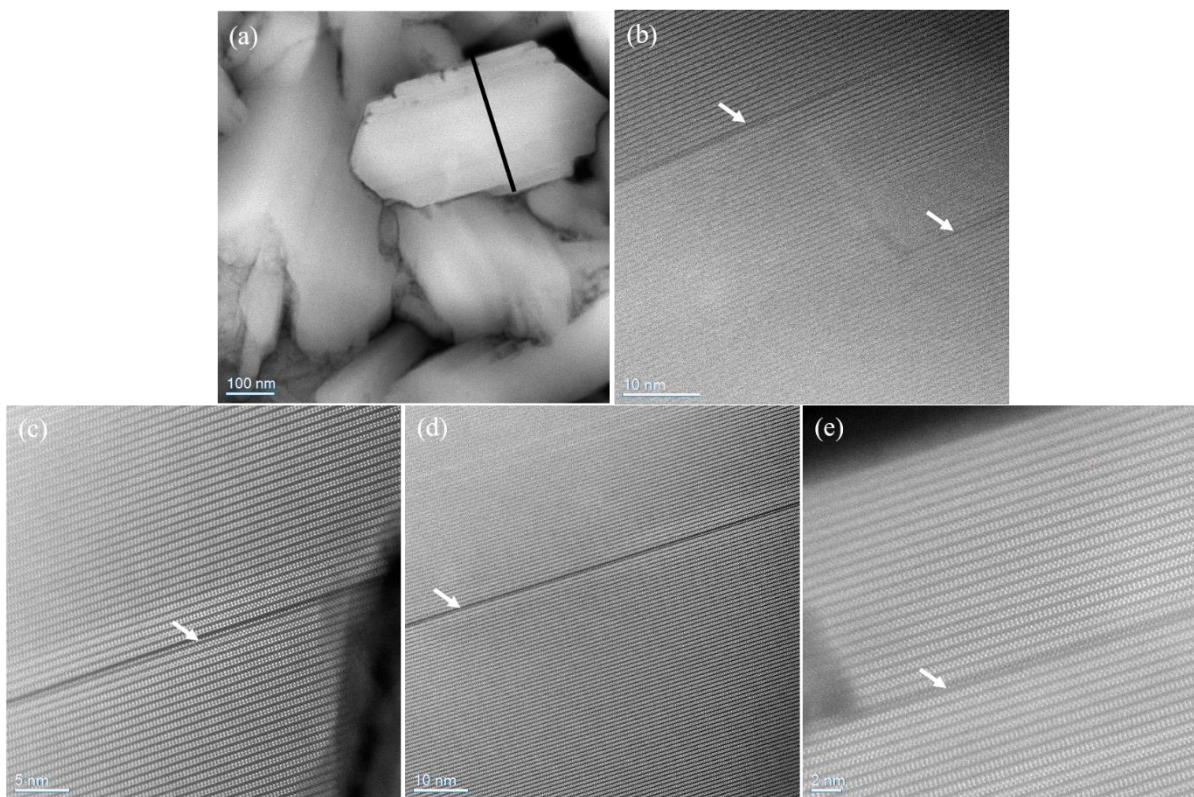

Figure. S7: (a)-(e) HAADF STEM micrographs of molybdenum aluminate (marked by white arrows) from different grains. (a) is used to calculate defect fraction of  $\text{Al}_3\text{Mo}$  inside  $\text{MoAlB}$  matrix.

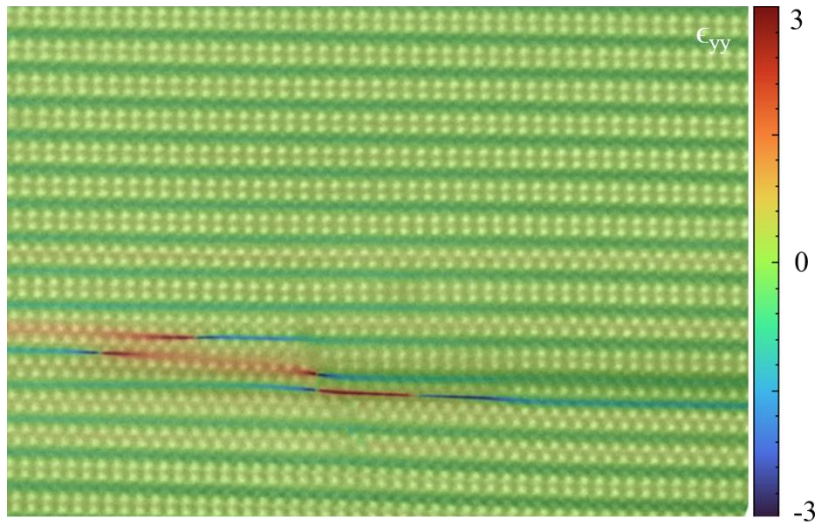

Figure. S8: Lattice distortion mapping along  $\epsilon_{yy}$ .

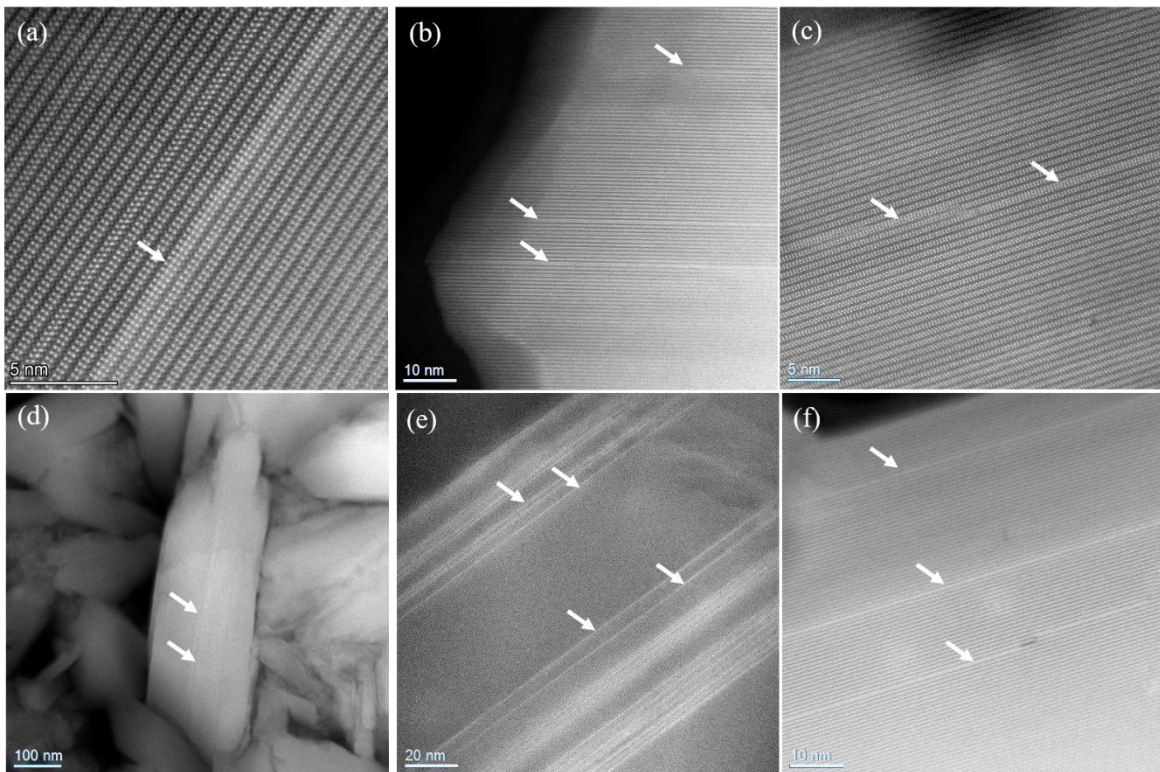

Figure. S9: (a)-(f) HAADF STEM images of compositional defect phase  $\text{Mo}_3\text{Al}_2\text{B}_4$ .

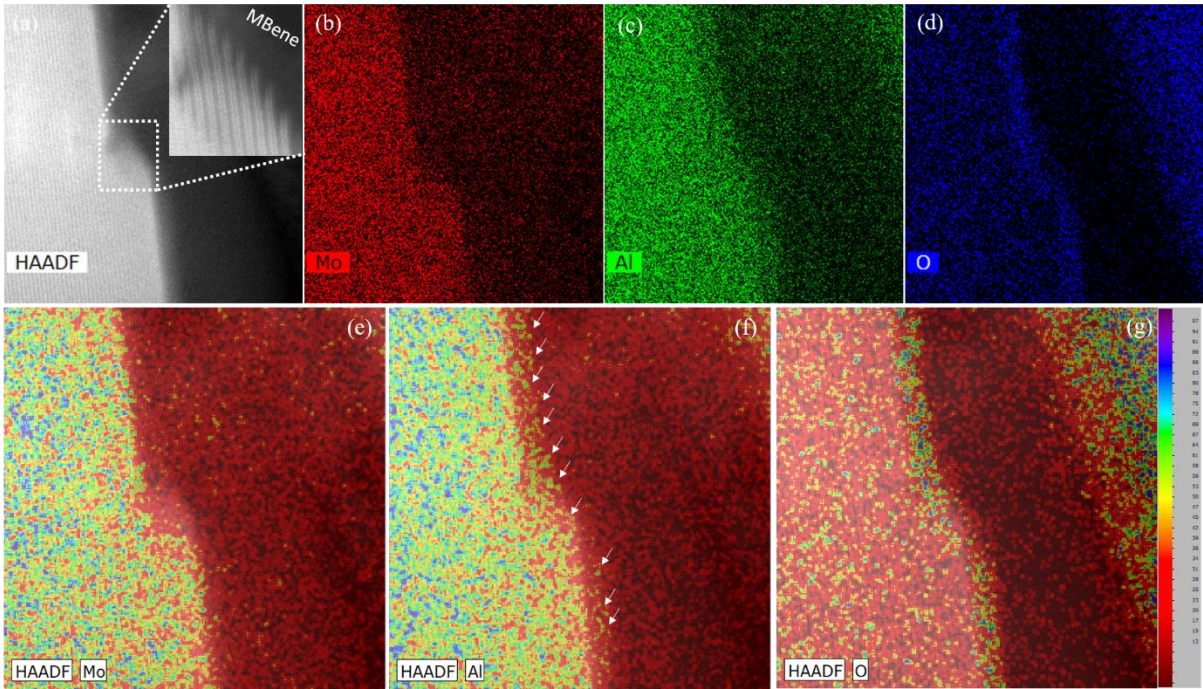

Figure. S10: (a) HRSTEM of 2D MoB MBene formation at grain boundary. (b)-(d) show elemental mapping of Mo, Al and O by STEM EDX. (e)-(g) present intensity distribution of the elemental maps.

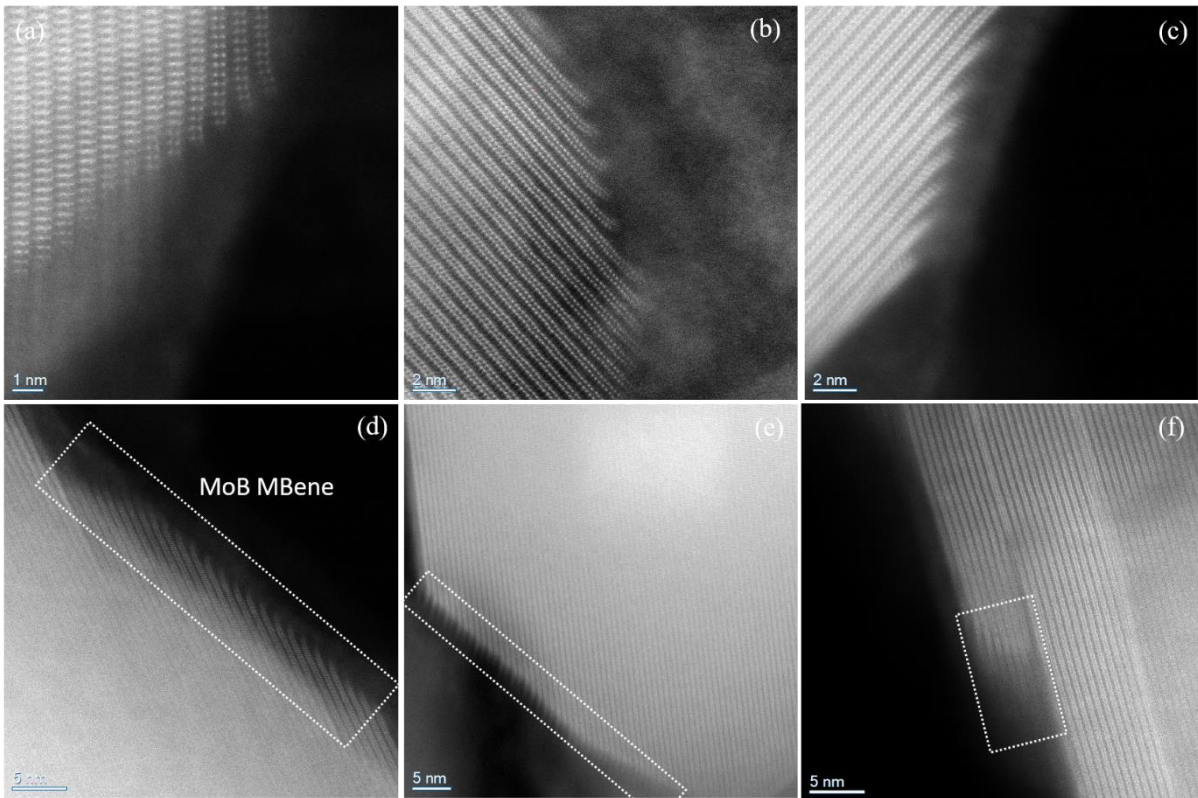

Figure. S11: (a)-(f) HRSTEM images of 2D MoB MBene form different MoAlB grains.
